# Supplementary material for: Effect of adipose-derived mesenchymal stem cell transplantation on vascular calcification in rats with adenine-induced kidney disease
Source: PubMed Central journal article supplement (PMC5656613; doi:10.1038/s41598-017-14492-9), 2017-10-25
Supplement: 41598_2017_14492_MOESM1_ESM.pdf [file 41598_2017_14492_MOESM1_ESM.pdf]

## Supplementary Information

### Effect of adipose-derived mesenchymal stem cell transplantation on vascular calcification in rats with adenine-induced kidney disease

Shinya Yokote<sup>a,\*</sup>, Yuichi Katsuoka<sup>b</sup>, Akifumi Yamada<sup>c</sup>, Ichiro Ohkido<sup>a</sup>, Takashi Yokoo<sup>a</sup>

<sup>a</sup> Division of Nephrology and Hypertension, Department of Internal Medicine, The Jikei University School of Medicine, 3-25-8 Nishi-shinbashi, Minato-ku, Tokyo 105-8461, Japan

<sup>b</sup> Department of Urology, St. Marianna University School of Medicine, 2-16-1, Sugao, Miyamae-ku, Kawasaki, Kanagawa, 216-8511, Japan

<sup>c</sup> Department of Pediatrics, The Jikei University School of Medicine, Tokyo, Japan

\*Correspondence and requests for materials should be addressed to T.Y. (e-mail: tyokoo@jikei.ac.jp)

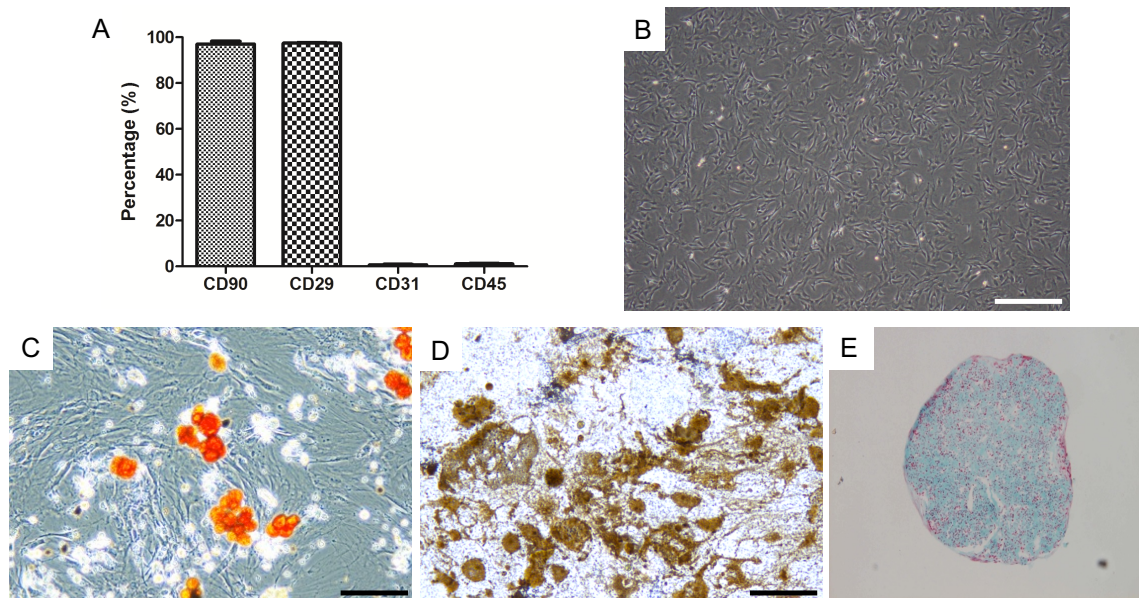

**Figure S1. Cell surface markers and differentiation capacities of mesenchymal stem cells (MSCs)**

(A) MSCs were positive for CD90 and CD29, and negative for CD31 and CD45. Data are the mean  $\pm$  S.E.M. (B–E) MSCs had the capacity to differentiate into adipogenic, chondrogenic, and osteogenic lineages. (Scale bars: 500  $\mu$ m in B; 100  $\mu$ m in C and D).

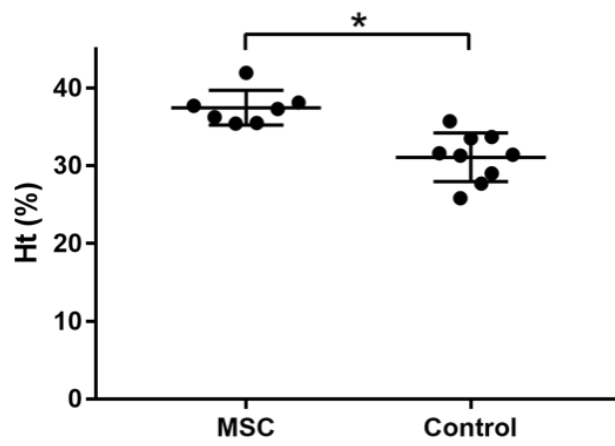

**Figure S2. Hematocrit (Ht) in adenine-fed rats on Day 42.**

Average of Ht levels on Day 42 in the MSC group were higher than those in the control group ( $P < 0.005$ ). Data are expressed as the mean  $\pm$  SEM.

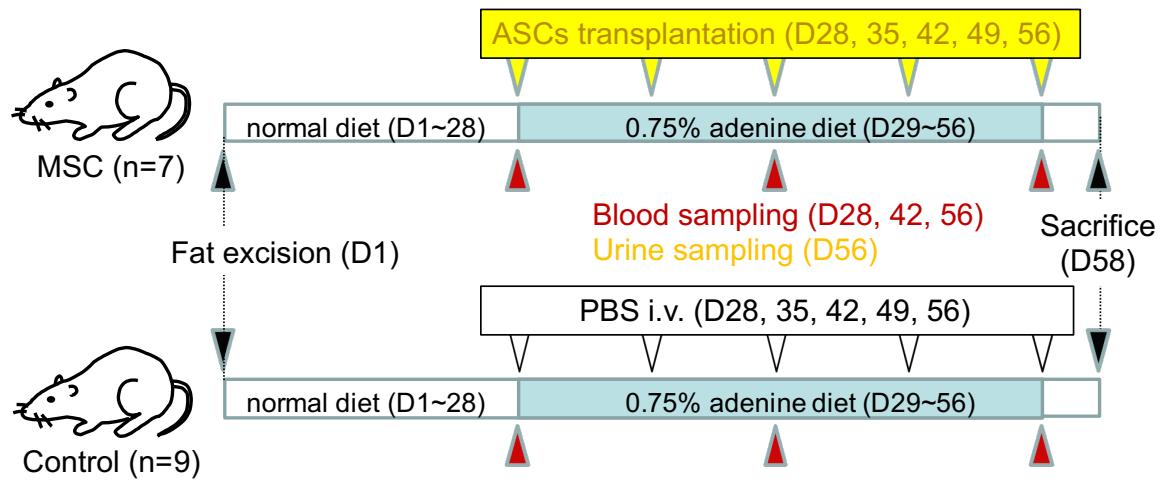

**Figure S3. Experimental set-up of Experiment 1.**

Adipose-derived mesenchymal stem cells (ASCs) were obtained from fat around the left femurs of 9-week-old male SD rats. Chronic kidney disease (CKD) was induced by maintaining the rats on a 0.75% adenine-supplemented diet for 4 weeks. The rats were randomized into two groups: an adenine control group (n = 9) and an MSC group (n = 7). ASCs ( $5 \times 10^5$ /rat) were intravenously administered to MSC rats every week for 4 weeks. All rats were sacrificed on day 58.

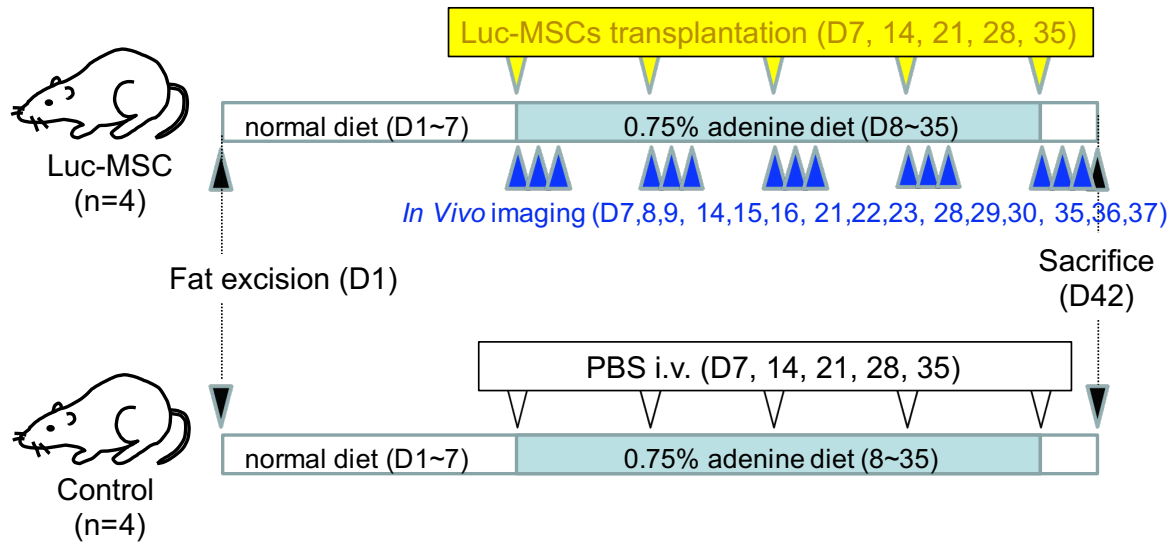

**Figure S4. Experimental set-up of Experiment 2.**

Luc<sup>+</sup> mesenchymal stem cells (MSCs) were obtained from luciferase-transgenic rats. Chronic kidney disease (CKD) was induced by maintaining the rats on a 0.75% adenine-supplemented diet for 4 weeks. The rats were randomized into two groups: an adenine control group (n = 4) and a Luc<sup>+</sup> MSC group (n = 4). Luc<sup>+</sup> MSCs ( $5 \times 10^5$ /rat) were intravenously administered to Luc-MSc rats every week for 4 weeks. Rats were imaged 10 min after D-luciferin injection using the Xenogen IVIS 200 system on days 0 (1 h post Luc<sup>+</sup> MSCs injection), 1 (24 h post Luc<sup>+</sup> MSCs injection), and 2 (48 h post Luc<sup>+</sup> MSCs injection).

**Table S1. Physical parameters at time of sacrifice for adenine-fed versus control rats**

|                  | Body weight<br>(g/day) | Water intake<br>(g/day) | Urine volume<br>(g/day) | Food consumption<br>(g/day) | Stool<br>(g/day) |
|------------------|------------------------|-------------------------|-------------------------|-----------------------------|------------------|
| MSC<br>(n=7)     | 282±3.48               | 61.5±2.86               | 46.6±3.21               | 11.1±0.68                   | 3.3±0.32         |
| Control<br>(n=9) | 272±7.63               | 52.8±4.41               | 45.8±3.28               | 9.96±1.36                   | 3.8±0.48         |
| P value          | n.s.                   | n.s.                    | n.s.                    | n.s.                        | n.s.             |

n.s., not significant.
